# Supplementary material for: Genetic Evidence of the Black Death in the Abbey of San Leonardo (Apulia Region, Italy): Tracing the Cause of Death in Two Individuals Buried with Coins
Source: MDPI journal article supplement (doi:10.3390/pathogens10111354), 2021-10-20

## Supplementary data

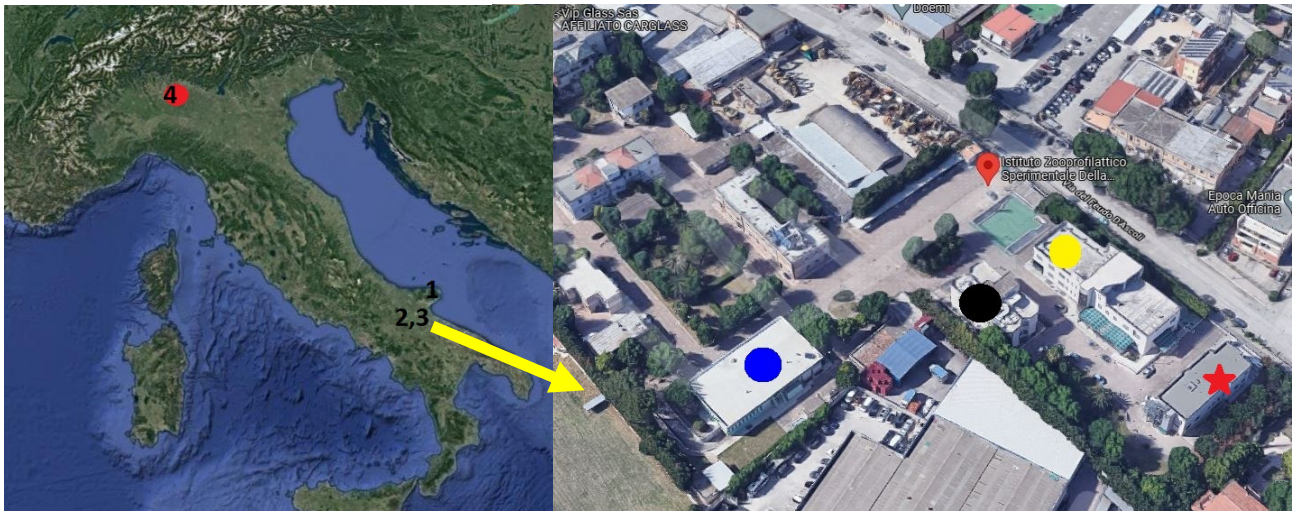

**Figure S1.**

Figure S1: Map of participating labs: 1: LB1 in Manfredonia (FG); 2,3: Detail of Istituto Zooprofilattico Sperimentale della Puglia e della Basilicata in Foggia with locations of laboratories included in this project or discarded because potentially unsuitable caused high risk of cross contamination (Red star: Headquarters; Yellow spot: S.S. Ricerca e Sviluppo (LB2); DNA extraction; Blue spot: S.S. Virologia (LB3); DNA amplification; Black spot: Biotechnologia e Vaccini (this lab was discarded and it was not included in this project because it currently works on the molecular detection of Bioterrorism agents); 4: LB4, Vibrione Milano (Sequencing Center).

Figure S2.

A four-colour chromatogram showing the results of Sanger sequencing of *pla* gene detected in T.6 (A) e T.2 (B); Amplification plot of *pla* gene of *Yersinia pestis* using a FAM-dye revelation running on the StepOne Realtime PCR instrument (Applied Biosystem, ThermoFischer scientific, MA, USA); Nucleotide chromatogram of *Y.pestis glpD* gene sequenced from T.6 (D) and sequence alignment (E).

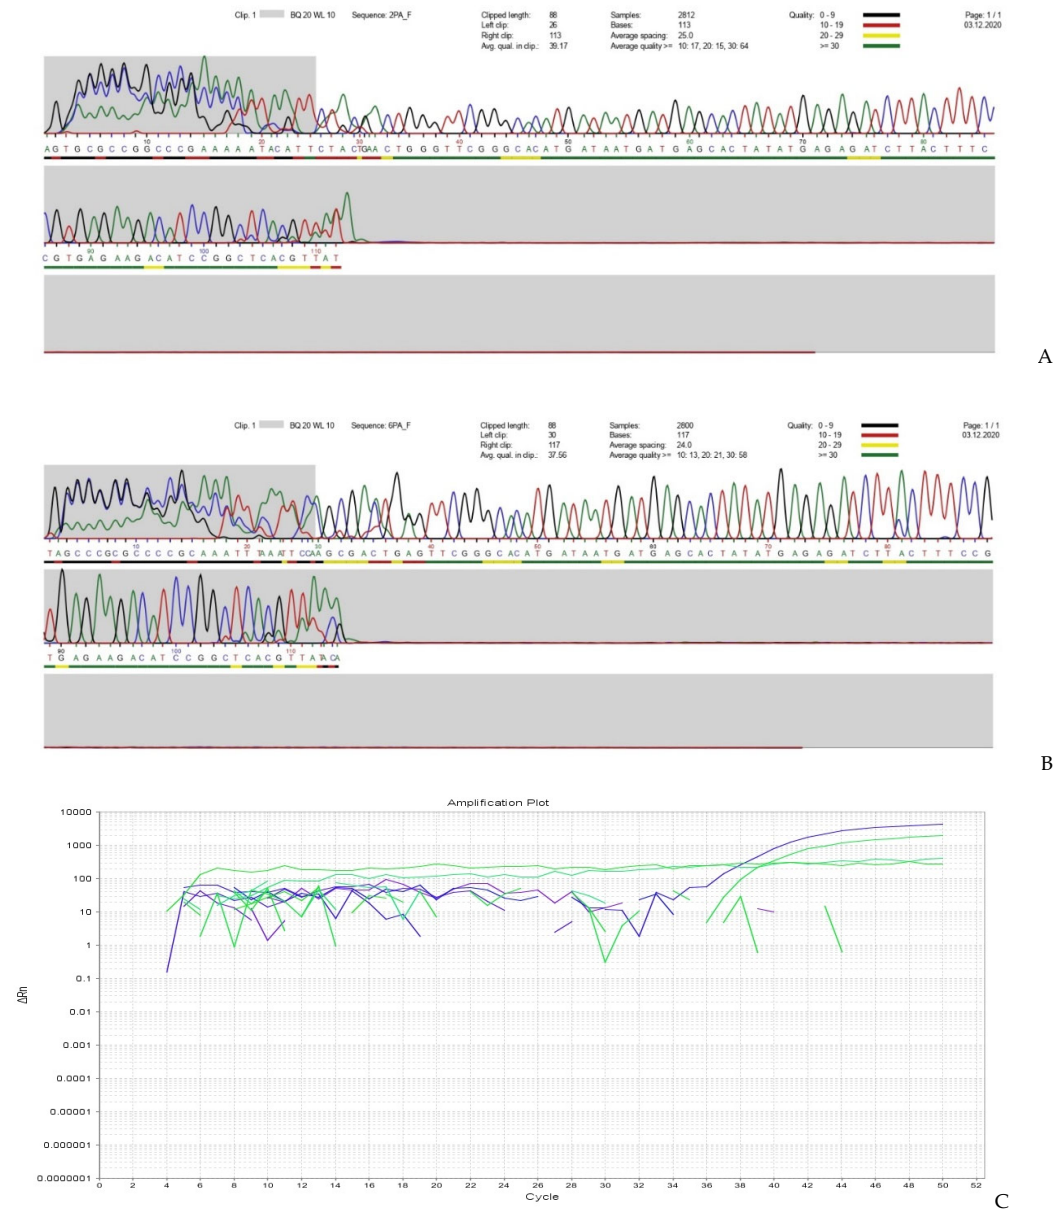

Sequence: SEQ1006467\_A1\_G11\_9

Sample: 12322  
Bases: 298  
Average spacing: 42.0  
Average quality: 10, 9, 20, 20, 30, 255

Quality: 0-9  
10-19  
20-29  
≥30

Page: 1/3  
14.09.2021

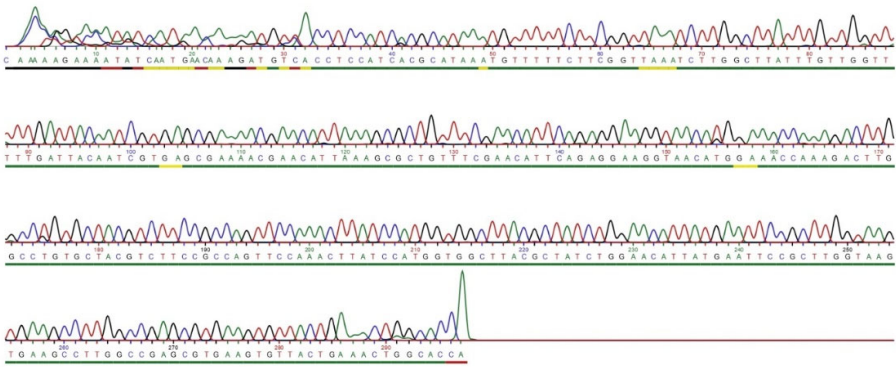

D

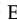

Supplement: s1 [file s1]
